# Supplementary material
Source: PubMed Central journal article supplement (PMC7834032)
Supplement: mmc2.pdf [file mmc2.pdf]

## **Appendix A. Questionnaire**

### **The effects of social media use during COVID-19 pandemic**

The following survey is prepared to measure the effects of social media use during COVID-19 pandemic. The data gathered will be used only for academic purposes and your personal details will be kept secret. Please answer the questions by selecting the most appropriate answer for yourself. Thank you very much for your cooperation.

Name removed for anonymity

#### **Demographic Questions**

**Gender:** Female/Male

**Age:** Under 18/18-24/25-29/30-34/35-39/40-44/45-49/50-54/55-59/60-64/65+

**Education Level:** Secondary School/High School/Undergraduate/Postgraduate/PhD

**Which of the following social networks do you use? (You can select more than one option)**

Facebook

Instagram

YouTube

Twitter

WhatsApp

LinkedIn

**Why do you use social networking? (You can select more than one option)**

To follow recent news

Chat and Communicate

To follow friends

To share

To play game

## Statements

Please answer the questions based on the social network you use most. The questions are related to the COVID-19 pandemic.

| Statement                                                                              | Strongly Disagree (1) | Disagree (2) | Neutral (3) | Agree (4) | Strongly Agree (5) |
|----------------------------------------------------------------------------------------|-----------------------|--------------|-------------|-----------|--------------------|
| 1. I have more information related to COVID-19 due to social media.                    |                       |              |             |           |                    |
| 2. I believe every news I saw on social media related to COVID-19.                     |                       |              |             |           |                    |
| 3. COVID-19 related news social media makes me panic.                                  |                       |              |             |           |                    |
| 4. My COVID-19 anxiety increased because of social media.                              |                       |              |             |           |                    |
| 5. I check for the original resource for the news that I saw related to COVID-19.      |                       |              |             |           |                    |
| 6. I started to have corona phobia due to social media.                                |                       |              |             |           |                    |
| 7. I recovered from my COVID-19 anxiety due to social media shares.                    |                       |              |             |           |                    |
| 8. Communicating with friends via social media helps me recover from COVID-19 anxiety. |                       |              |             |           |                    |
| 9. I share COVID-19 related news on social media to get attention.                     |                       |              |             |           |                    |
| 10. I share every news related to COVID-19.                                            |                       |              |             |           |                    |
| 11. There is unnecessary panic related to COVID-19 because of social media.            |                       |              |             |           |                    |
| 12. The shares related to COVID-19 are exaggerated.                                    |                       |              |             |           |                    |
| 13. The importance I give to personal hygiene increased due to social media.           |                       |              |             |           |                    |
| 14. The importance I give to environmental hygiene increased due to social media.      |                       |              |             |           |                    |
| 15. I started to have hygiene obsession due to social media which I had not before.    |                       |              |             |           |                    |
| 16. News related to COVID-19 should be censored.                                       |                       |              |             |           |                    |

| Statement                                                                                                      | Strongly Disagree (1) | Disagree (2) | Neutral (3) | Agree (4) | Strongly Agree (5) |
|----------------------------------------------------------------------------------------------------------------|-----------------------|--------------|-------------|-----------|--------------------|
| 17. I only consider the statements which are declared by WHO, UNICEF, Ministry of Health or Physician's Union. |                       |              |             |           |                    |
| 18. My anxiety for COVID-19 started because of social media.                                                   |                       |              |             |           |                    |
| 19. I follow the recent information related to COVID-19 from social media.                                     |                       |              |             |           |                    |
| 20. I feel stronger related to COVID-19 due to social media.                                                   |                       |              |             |           |                    |
| 21. Social media enables me to get support related to COVID-19.                                                |                       |              |             |           |                    |
| 22. Social media is significantly effecting decision-makers decisions' related to COVID-19.                    |                       |              |             |           |                    |

## Appendix B. Sources of questions

| Statement                                                                                                  | Source                           |
|------------------------------------------------------------------------------------------------------------|----------------------------------|
| I only consider the statements which are declared by WHO, UNICEF, Ministry of Health or Physician's Union. | Talwar et al. (2019)             |
| I have more information related to COVID-19 due to social media.                                           | Kaya and Bicen (2016)            |
| I check for the original resource for the news that I saw related to COVID-19.                             | Talwar et al. (2019)             |
| I follow the recent information related to COVID-19 from social media.                                     | Moghanibashi-Mansouriehab (2020) |
| The importance I give to environmental hygiene increased due to social media.                              | Self made question               |
| The importance I give to personal hygiene increased due to social media.                                   | Self made question               |
| The shares related to COVID-19 are exaggerated.                                                            | Ruggieri et al. (2020)           |
| Social media is significantly effecting decision-makers decisions' related to COVID-19.                    | Kaya et al. (2020)               |
| There is unnecessary panic related to COVID-19 because of social media.                                    | Self made question               |
| My COVID-19 anxiety increased because of social media.                                                     | Kaya and Bicen (2016)            |

|                                                                                     |                                  |
|-------------------------------------------------------------------------------------|----------------------------------|
| I started to have hygiene obsession due to social media which I had not before.     | Self made question               |
| I started to have corona phobia due to social media.                                | Self made question               |
| COVID-19 related news social media makes me panic.                                  | Ruggieri et al. (2020)           |
| My anxiety for COVID-19 started because of social media.                            | Moghanibashi-Mansouriehab (2020) |
| Social media enables me to get support related to COVID-19.                         | Hsu and Lin (2020)               |
| Communicating with friends via social media helps me recover from COVID-19 anxiety. | Hsu and Lin (2020)               |
| I feel stronger related to COVID-19 due to social media.                            | Hsu and Lin (2020)               |
| News related to COVID-19 should be censored.                                        | Self made question               |
| I recovered from my COVID-19 anxiety due to social media shares.                    | Ruggieri et al. (2020)           |
| I believe every news I saw on social media related to COVID-19.                     | Talwar et al. (2019)             |
| I share COVID-19 related news on social media to get attention.                     | Kaya and Bicen (2016)            |
| I share every news related to COVID-19.                                             | Kaya and Bicen (2016)            |
